# Supplementary material
Source: MDPI journal article supplement (https://www.mdpi.com/2079-6412/9/8/523)
Supplement: s1 [file s1]

## Supplementary Materials:

# Design of Scorodite@Fe<sub>3</sub>O<sub>4</sub> Core–Shell Materials and the Fe<sub>3</sub>O<sub>4</sub> Shell Prevents Leaching of Arsenic from Scorodite in Neutral and Alkaline Environments

Yang Wang<sup>1</sup>, Zhihao Rong<sup>1</sup>, Xincun Tang<sup>1,\*</sup> and Shan Cao<sup>2,\*</sup>

<sup>1</sup> College of Chemistry and Chemical Engineering, Central South University, Changsha 410083, China

<sup>2</sup> School of Light Industry and Engineering, Qilu University of Technology, Jinan 250353, China

\* Correspondence: tangxincun@csu.edu.cn (X.T.); cs1988@qlu.edu.cn (S.C.)

Table S1. Components of dust.

| Test     | As (wt %) | K (wt %) | Al (wt %) | Zn (wt %) | Na (wt %) |
|----------|-----------|----------|-----------|-----------|-----------|
| Sample 1 | 41.3      | 0.7      | 0.1       | 0.4       | 0.3       |
| Sample 2 | 42.5      | 0.6      | 0.1       | 0.5       | 0.2       |
| Sample 3 | 43.1      | 0.5      | 0.1       | 0.6       | 0.3       |

Table S2. Components of leaching liquid.

| Test     | As (g·L <sup>-1</sup> ) | K (g·L <sup>-1</sup> ) | Al (g·L <sup>-1</sup> ) | Zn (g·L <sup>-1</sup> ) | Na (g·L <sup>-1</sup> ) |
|----------|-------------------------|------------------------|-------------------------|-------------------------|-------------------------|
| Sample 1 | 20.7                    | 0.4                    | 0.01                    | 0.01                    | 0.2                     |
| Sample 2 | 22.1                    | 0.6                    | 0.01                    | 0.01                    | 0.2                     |
| Sample 3 | 24.7                    | 0.7                    | 0.01                    | 0.01                    | 0.3                     |

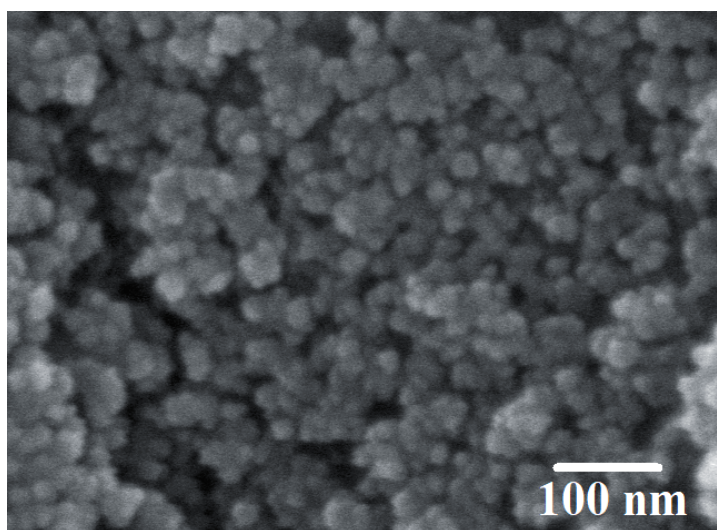

Figure S1. The SEM image of Sample 2 (initial Fe ions/Scorodite molar ratio = 9%, initial reaction pH = 8, reaction time = 15 min).

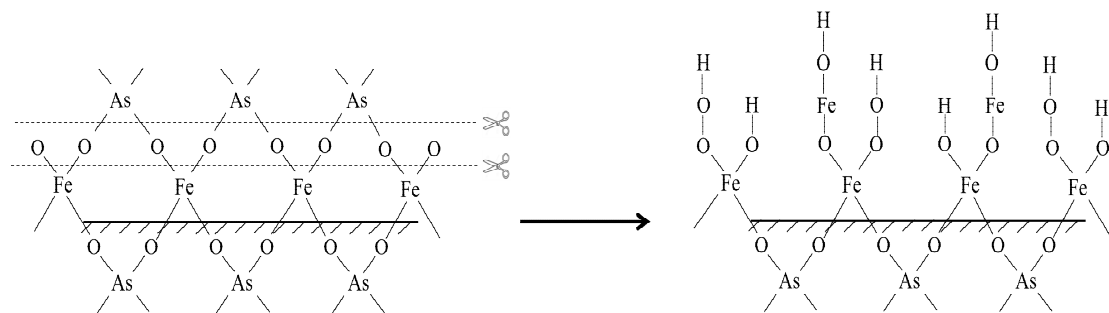

**Figure S2.** Schematic diagram of the forming process of  $\text{Fe}_x(\text{OH})_y\text{-AsO}_4$  layer.
